# Supplementary material
Source: PubMed Central journal article supplement (PMC11030575)
Supplement: 262_2010_908_MOESM1_ESM.pdf [file 262_2010_908_MOESM1_ESM.pdf]

**a****KG-1****MG-132****bortezomib**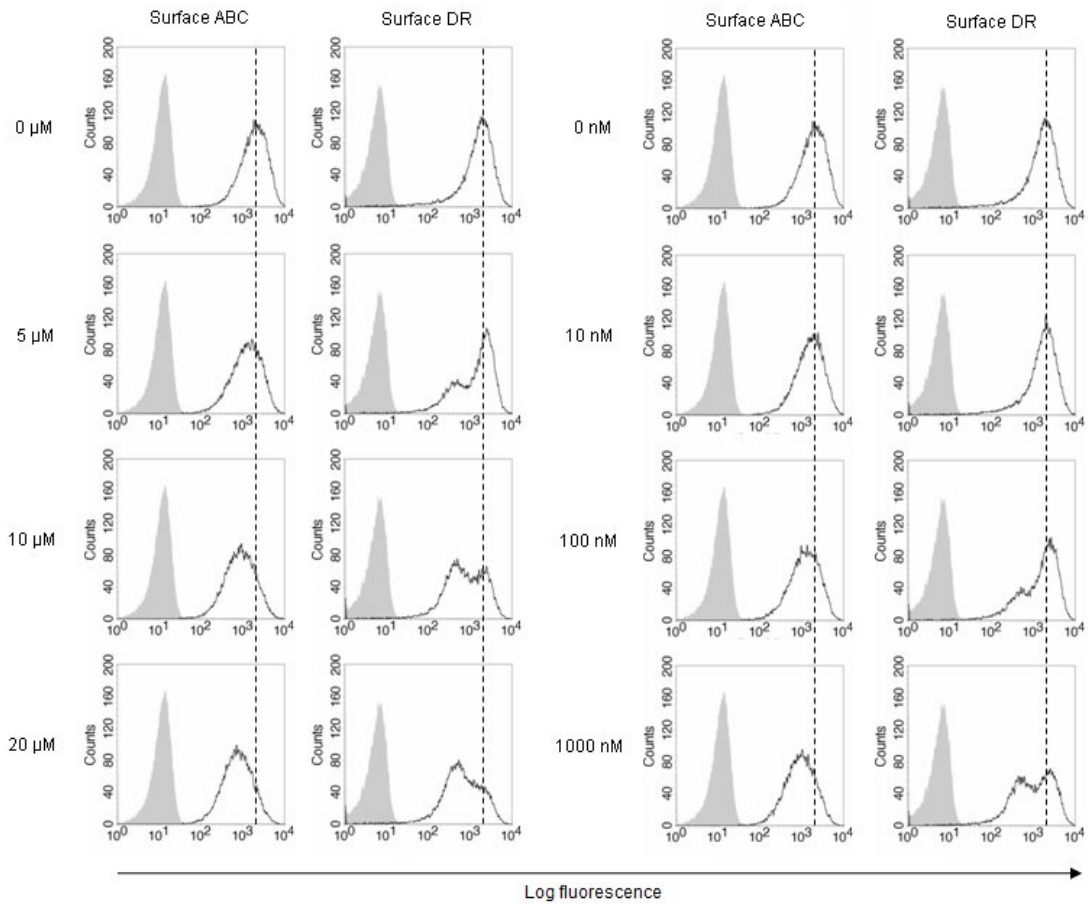**b****ME-1**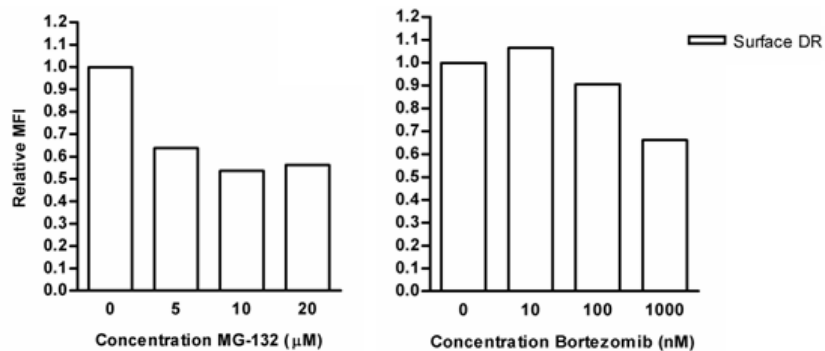

**Supplemental Fig. S1** Representative experiments showing the dose-dependent effect of proteasome inhibition on the expression of HLA-DR at the KG-1 (**a**) and ME-1 (**b**) plasma membrane. Histograms (*unfilled peaks*) with their corresponding IgG controls (*filled peaks*) are shown for blasts treated with increasing concentrations of the MG-132 and bortezomib proteasome inhibitor.

KG-1

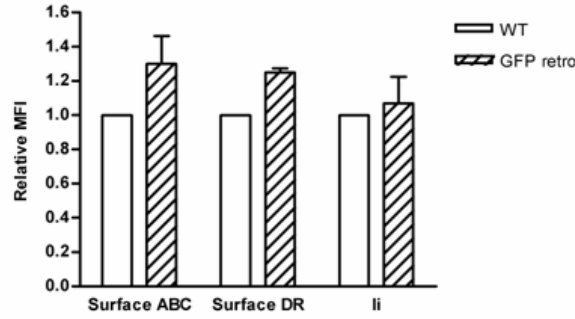

**Supplemental Fig. S2** Control experiments for the retroviral transduction effect on surface HLA class I ('ABC'), surface HLA-DR and Ii expression. We performed two independent transductions of KG-1 blasts with irrelevant GFP-encoding retrovirus and related MFI values ( $\pm$  SEM) on GFP-gated transduced ('GFP retro') blasts to those on wild type ('WT') blasts.

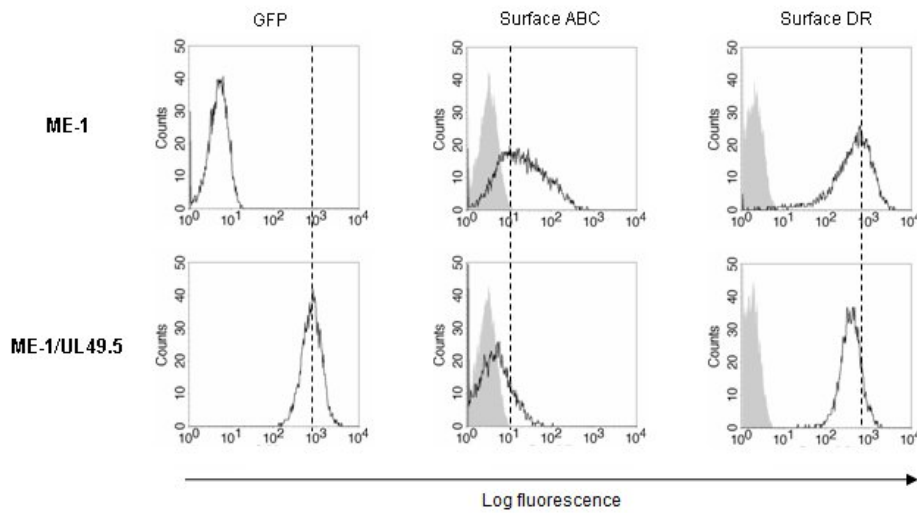

**Supplemental Fig. S3** TAP inhibition in the CLIP<sup>+</sup> ME-1 leukemic cell line and the effect on HLA-DR levels at the plasma membrane. ME-1 blasts were transduced with GFP-encoding UL49.5 retrovirus and analyzed for HLA class I ('ABC') and HLA-DR expression after flow cytometric sorting of GFP-expressing blasts. Histograms of GFP-gated blasts are depicted.

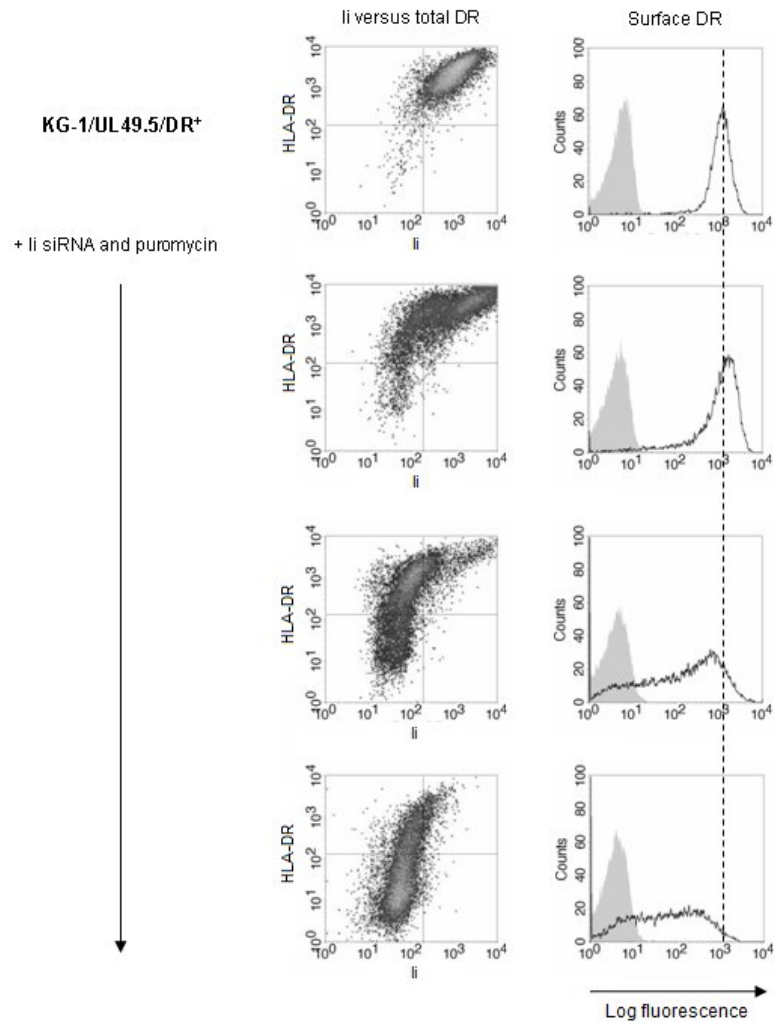

**Supplemental Fig. S4** Puromycin selection of TAP-inhibited KG-1 blasts bearing li siRNA. GFP<sup>+</sup> KG-1/UL49.5/DR<sup>+</sup> blasts retrovirally transfected with li siRNAs were selected by adding puromycin after two days of treatment. During this selection, we performed flow cytometric analyses of li and total HLA-DR expression levels in permeabilized blasts (*dot plots*), as well as plasma membrane expression of HLA-DR on intact, 7AAD<sup>-</sup> blasts (*unfilled histograms*). Stainings of the same cells with control IgG are shown as *filled histograms*.
